# Supplementary material for: Reconstruction of the gastric cancer microenvironment after neoadjuvant chemotherapy by longitudinal single-cell sequencing
Source: Springer Nature journal article supplement (doi:10.1186/s12967-022-03792-y), 2022-12-06

A

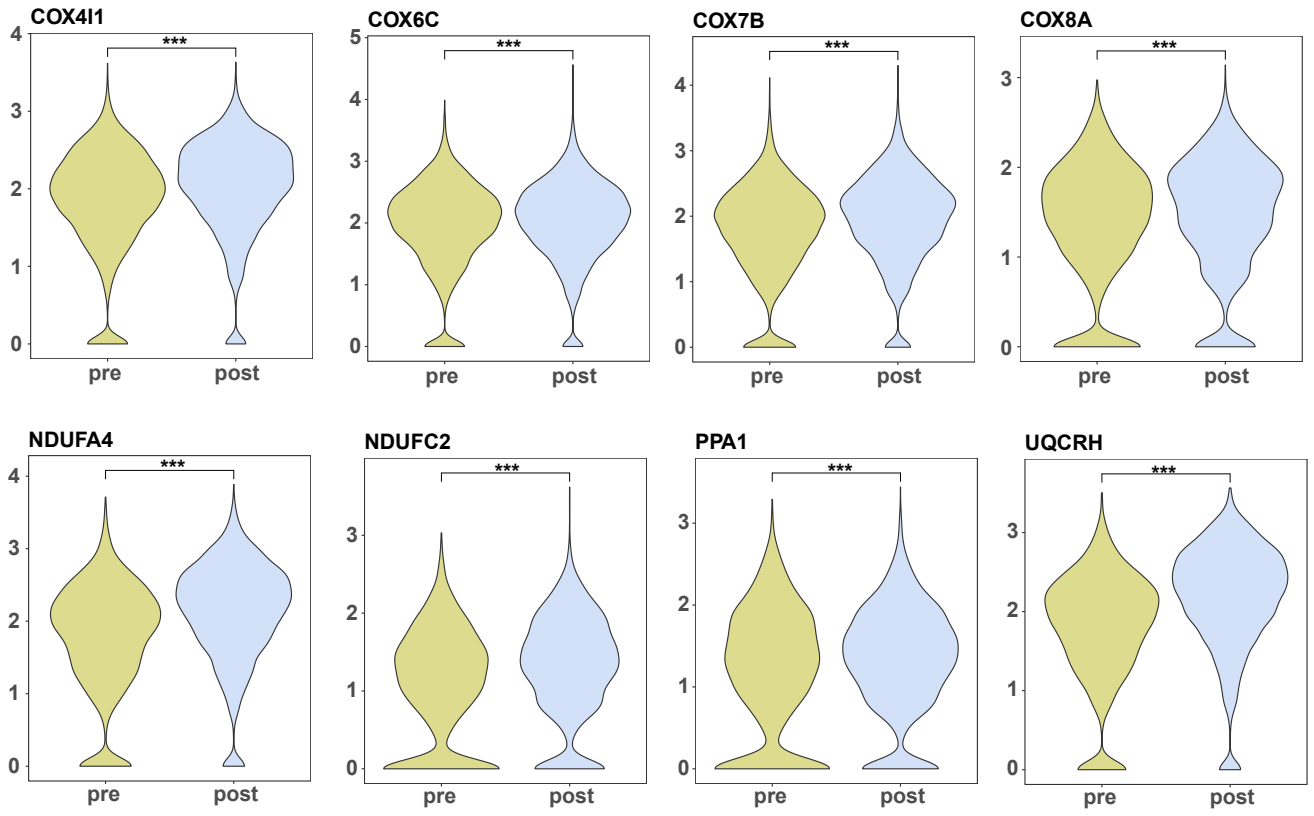

B

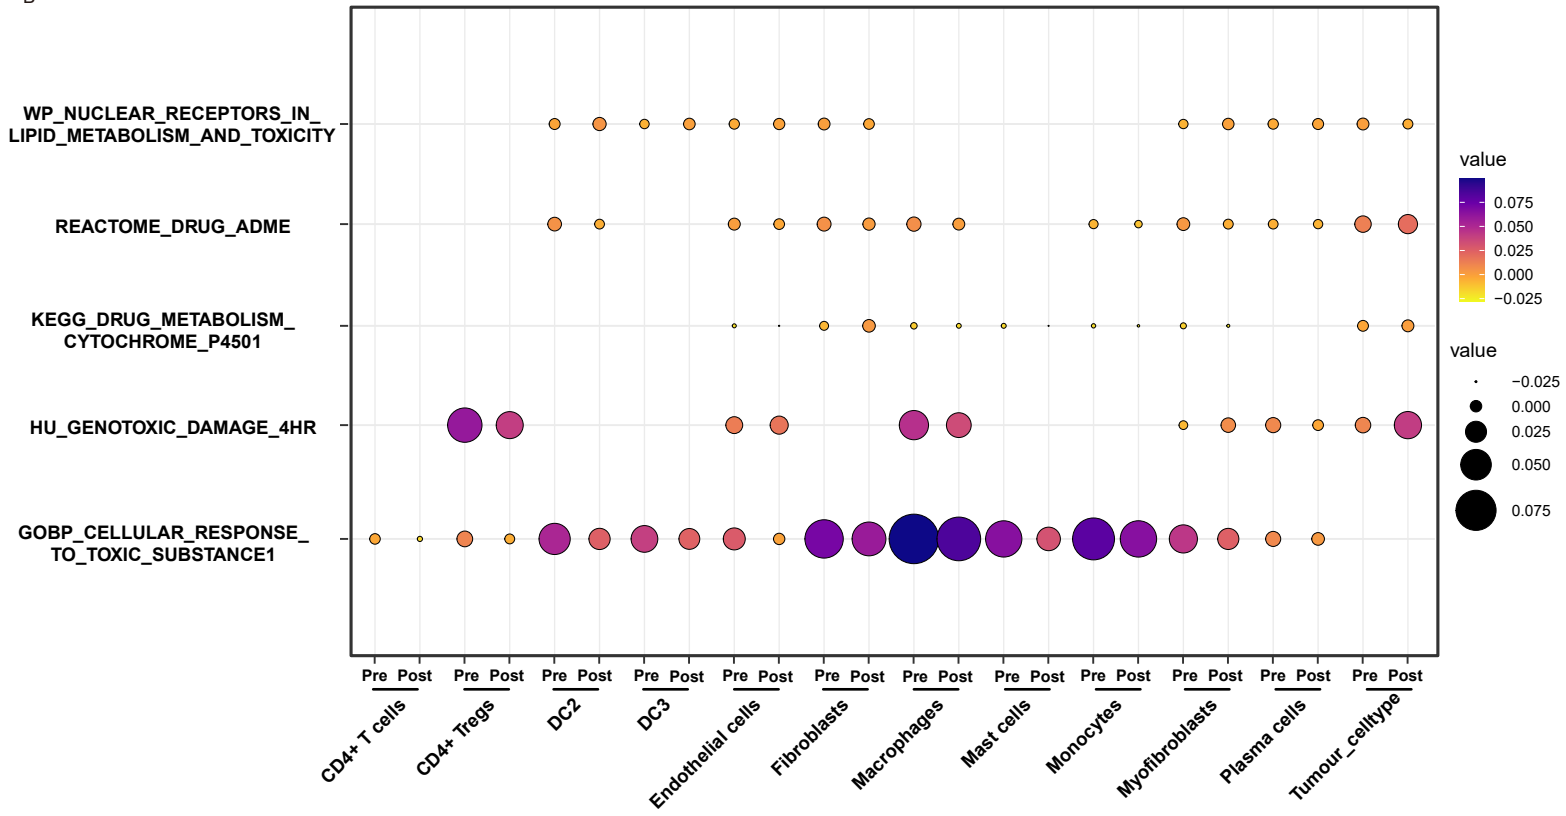

C

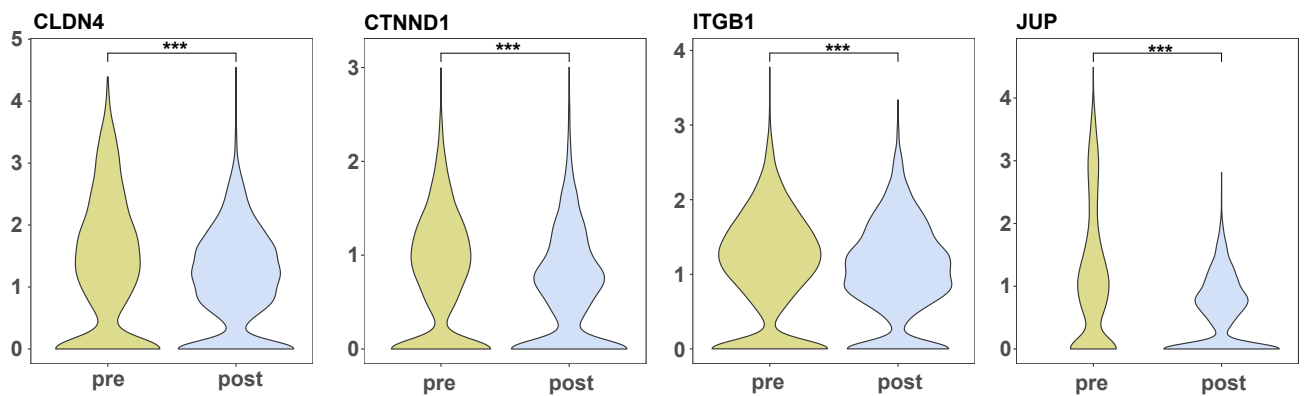

Supplement: MOESM4 [file 23795296]
