# Supplementary material for: Reconstruction of the gastric cancer microenvironment after neoadjuvant chemotherapy by longitudinal single-cell sequencing
Source: Springer Nature journal article supplement (doi:10.1186/s12967-022-03792-y), 2022-12-06

A

## Macrophages, post versus pre

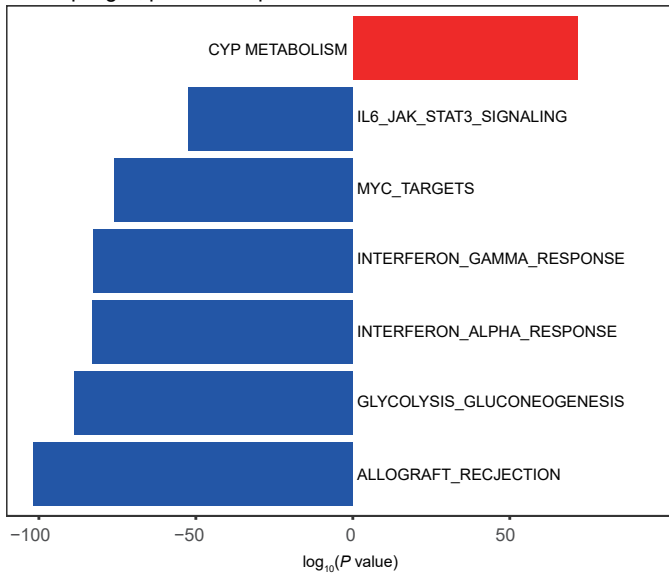

## Monocytes, post versus pre

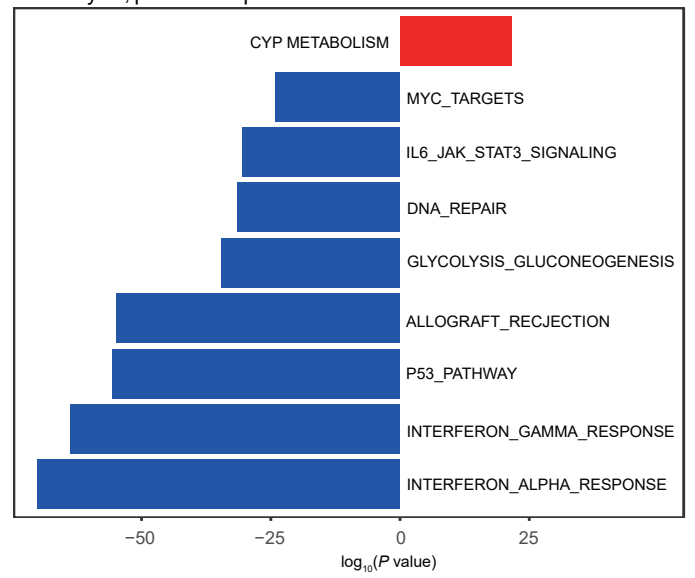

B

## Macrophages

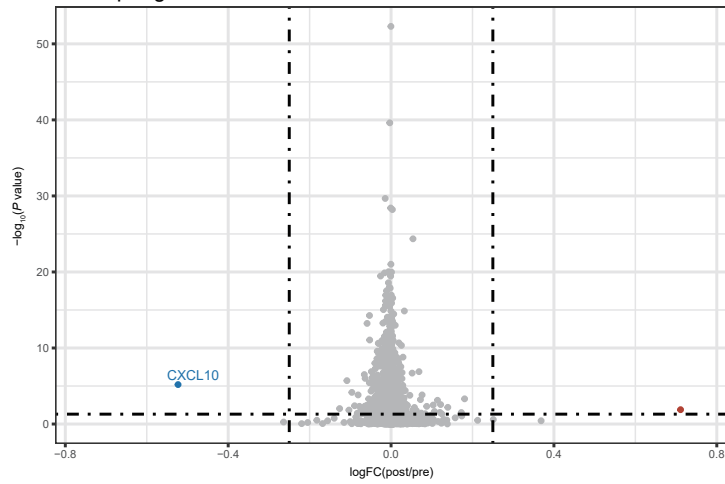

## Monocytes

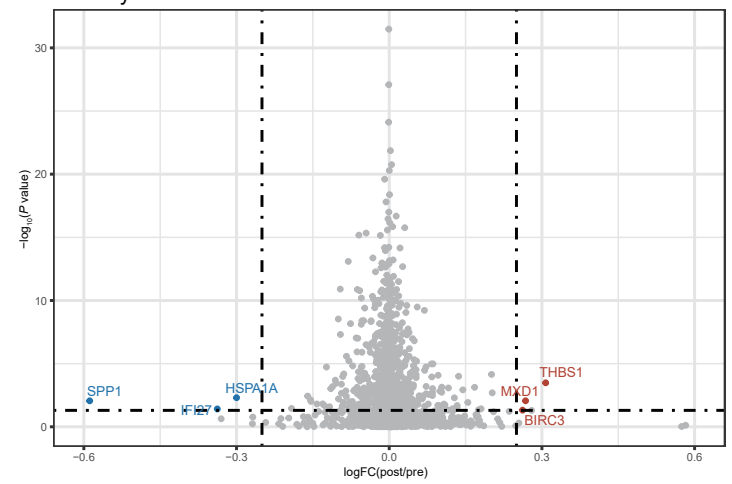

C

## Macrophages

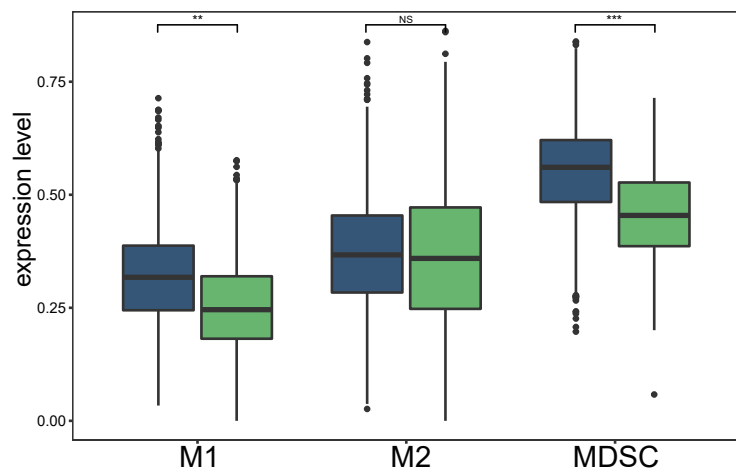

## Monocytes

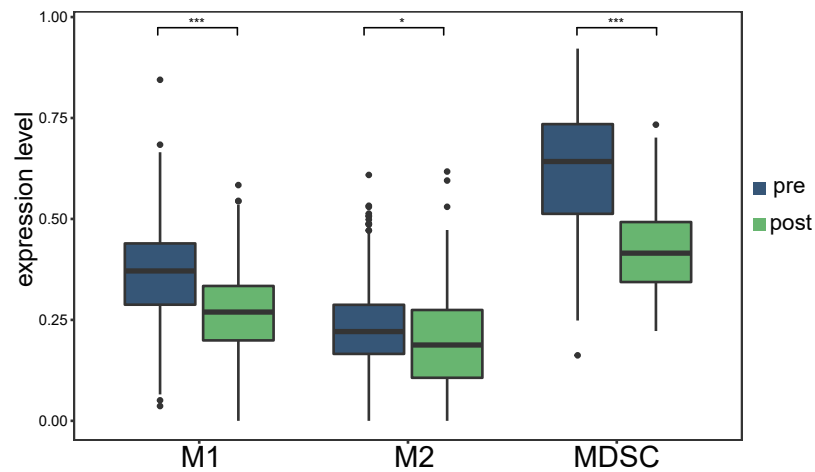

Supplement: MOESM5 [file 23795296]
